# Supplementary material for: Species-specific metabolic reprogramming in human and mouse microglia during inflammatory pathway induction
Source: PubMed Central journal article supplement (PMC10575978; doi:10.1038/s41467-023-42096-7), 2023-10-13
Supplement: 41467_2023_42096_MOESM4_ESM.pdf [file 41467_2023_42096_MOESM4_ESM.pdf]

## Description of Additional Supplementary Files

**Supplementary Dataset 1:** Differential gene expression comparison between LPS4 hours versus control in Murine microglia. Columns depict output of DESEQ2 results function: Gene name, mean expression of the control condition, Log2FoldChange of the difference between conditions, lfcSE (Standard Error of the Log2FoldChange), stat value (Wald statistic), pvalue and adjusted pvalue (multitesting correction).

**Supplementary Dataset 2** Differential gene expression comparison between LPS24 hours versus control in Murine microglia. Columns depict output of DESEQ2 results function: Gene name, mean expression of the control condition, Log2FoldChange of the difference between conditions, lfcSE (Standard Error of the Log2FoldChange), stat value (Wald statistic), pvalue and adjusted pvalue (multitesting correction).

**Supplementary Dataset 3** Differentially expressed genes in LPS-treated murine microglia. Left table depicts filtering of genes with padjusted values less than 0,05 in the comparisons of 4 and 24 hours LPS versus control. Right table depicts filtering of genes with padjusted values less than 0,05 and absolute Log2Fold Changes of at least 1,5 in the comparisons of 4 and 24 hours LPS versus control.

**Supplementary Dataset 4** Differential gene expression comparison between LPS24 hours versus LPS4 hours in Murine microglia. Columns depict output of DESEQ2 results function: Gene name, mean expression of the control condition, Log2FoldChange of the difference between conditions, lfcSE (Standard Error of the Log2FoldChange), stat value (Wald statistic), pvalue and adjusted pvalue (multitesting correction).

**Supplementary Dataset 5.** Differential gene expression comparison between LPS4 hours versus Control in Human microglia. Columns depict output of DESEQ2 results function: Gene name, mean expression of the control condition, Log2FoldChange of the difference between conditions, lfcSE (Standard Error of the Log2FoldChange), stat value (Wald statistic), pvalue and adjusted pvalue (multitesting correction).

**Supplementary Dataset 6.** Differential gene expression comparison between LPS24 hours versus Control in Human microglia. Columns depict output of DESEQ2 results function: Gene name, mean expression of the control condition, Log2FoldChange of the difference between conditions, lfcSE (Standard Error of the Log2FoldChange), stat value (Wald statistic), pvalue and adjusted pvalue (multitesting correction).

**Supplementary Dataset 7.** Differential gene expression comparison between LPS24 hours versus LPS4 hours in Human microglia. Columns depict output of DESEQ2 results function: Gene name, mean expression of the control condition, Log2FoldChange of the difference between conditions, lfcSE (Standard Error of the Log2FoldChange), stat value (Wald statistic), pvalue and adjusted pvalue (multitesting correction).
